# Supplementary material for: Transition-Metal-Free Synthesis of Unsymmetrical Diaryl Tellurides via SH2 Reaction of Aryl Radicals on Tellurium
Source: MDPI journal article supplement (doi:10.3390/molecules27030809), 2022-01-26

Supplementary Materials

# Transition-Metal-Free Synthesis of Unsymmetrical Diaryl Tellurides via $S_H2$ Reaction of Aryl Radicals on Tellurium

Yuki Yamamoto, Fumiya Sato, Qiqi Chen, Shintaro Kodama \*, Akihiro Nomoto and Akiya Ogawa \*

Department of Applied Chemistry, Graduate School of Engineering, Osaka Prefecture University, Osaka 599-8531, Japan, syb02137@edu.osakafu-u.ac.jp (Y.Y.); szb02060@edu.osakafu-u.ac.jp (F.S.); scb02096@edu.osakafu-u.ac.jp (Q.C.); nomoto@chem.osakafu-u.ac.jp (A.N.)

\* Correspondence: skodama@chem.osakafu-u.ac.jp (S.K.); ogawa@chem.osakafu-u.ac.jp (A.O.)

## Contents

Copies of  $^1H$  and  $^{13}C\{^1H\}$  NMR spectra ···2–10

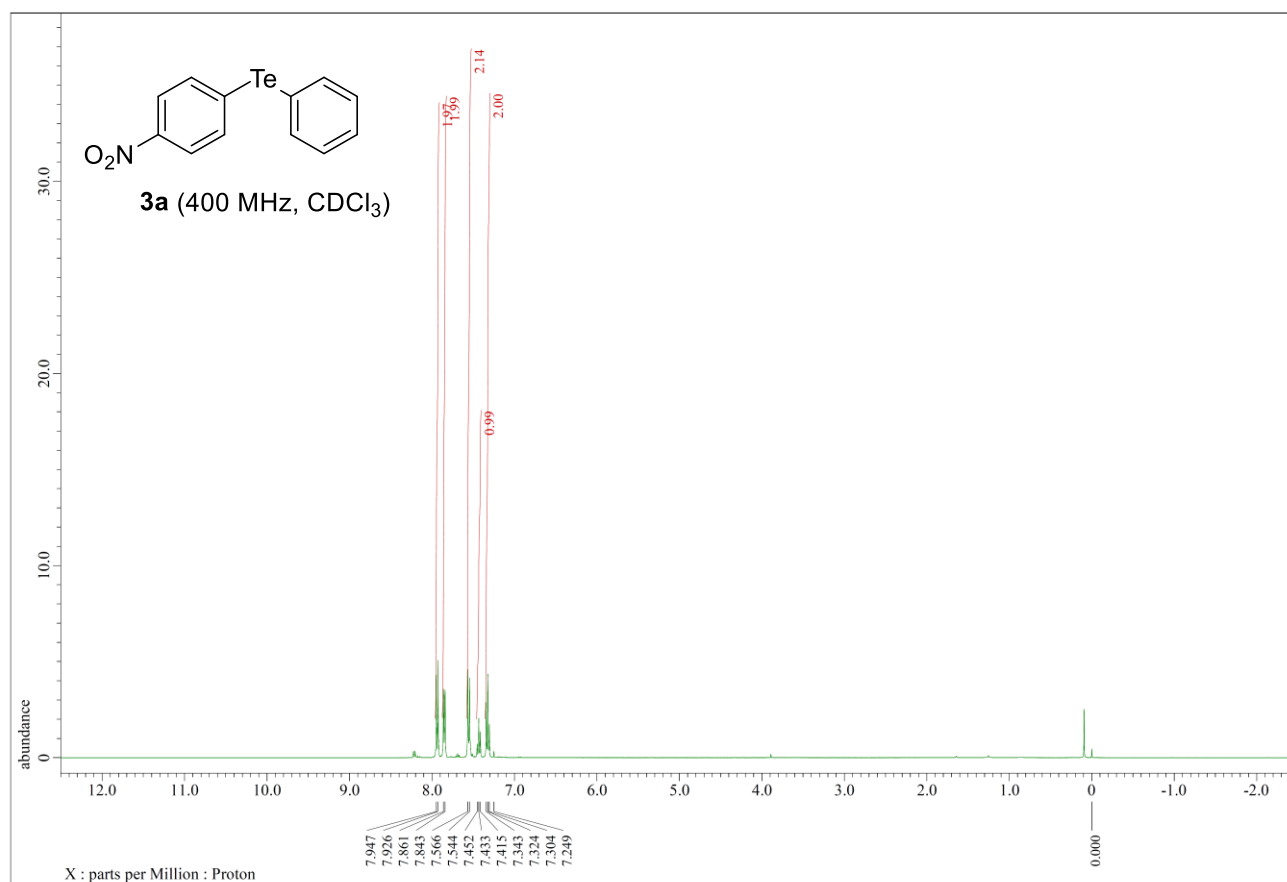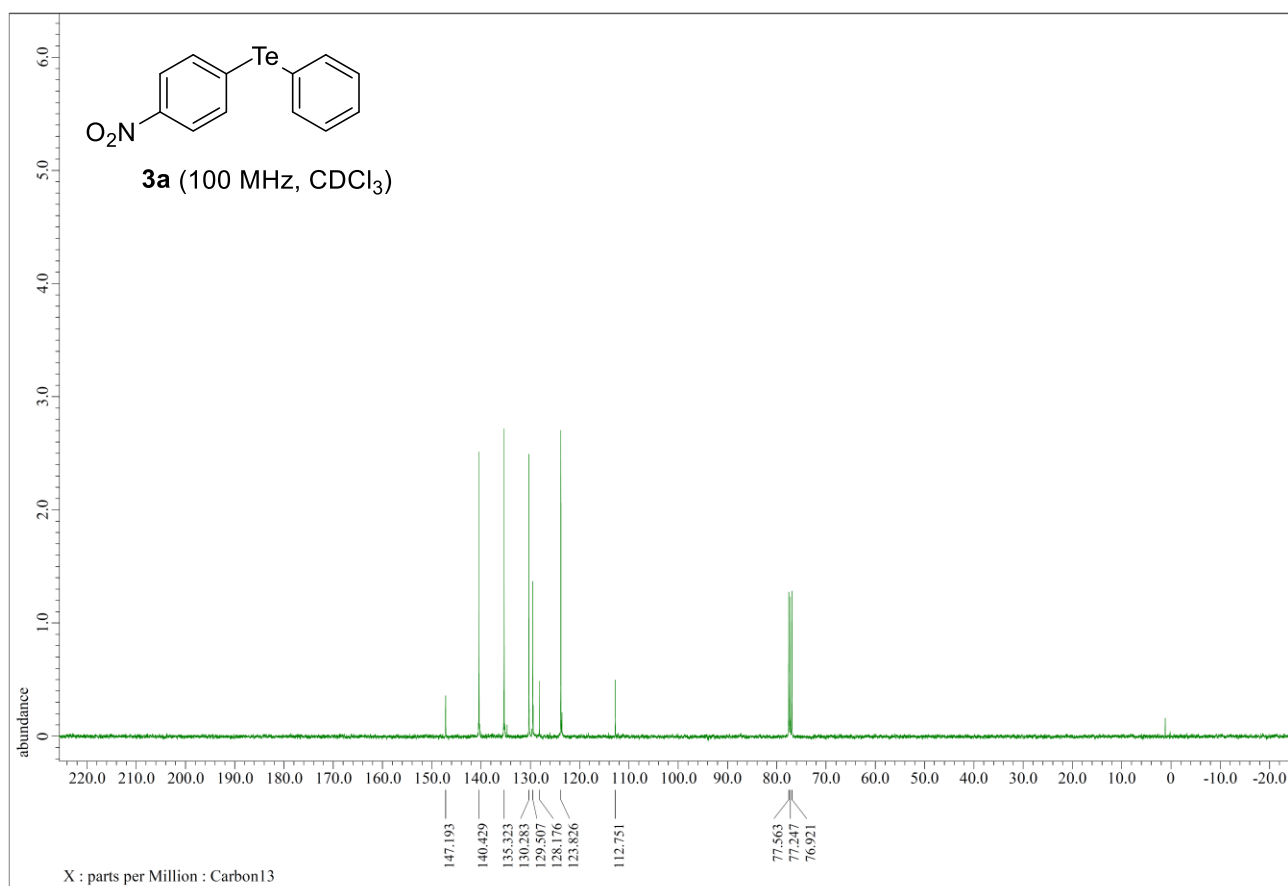

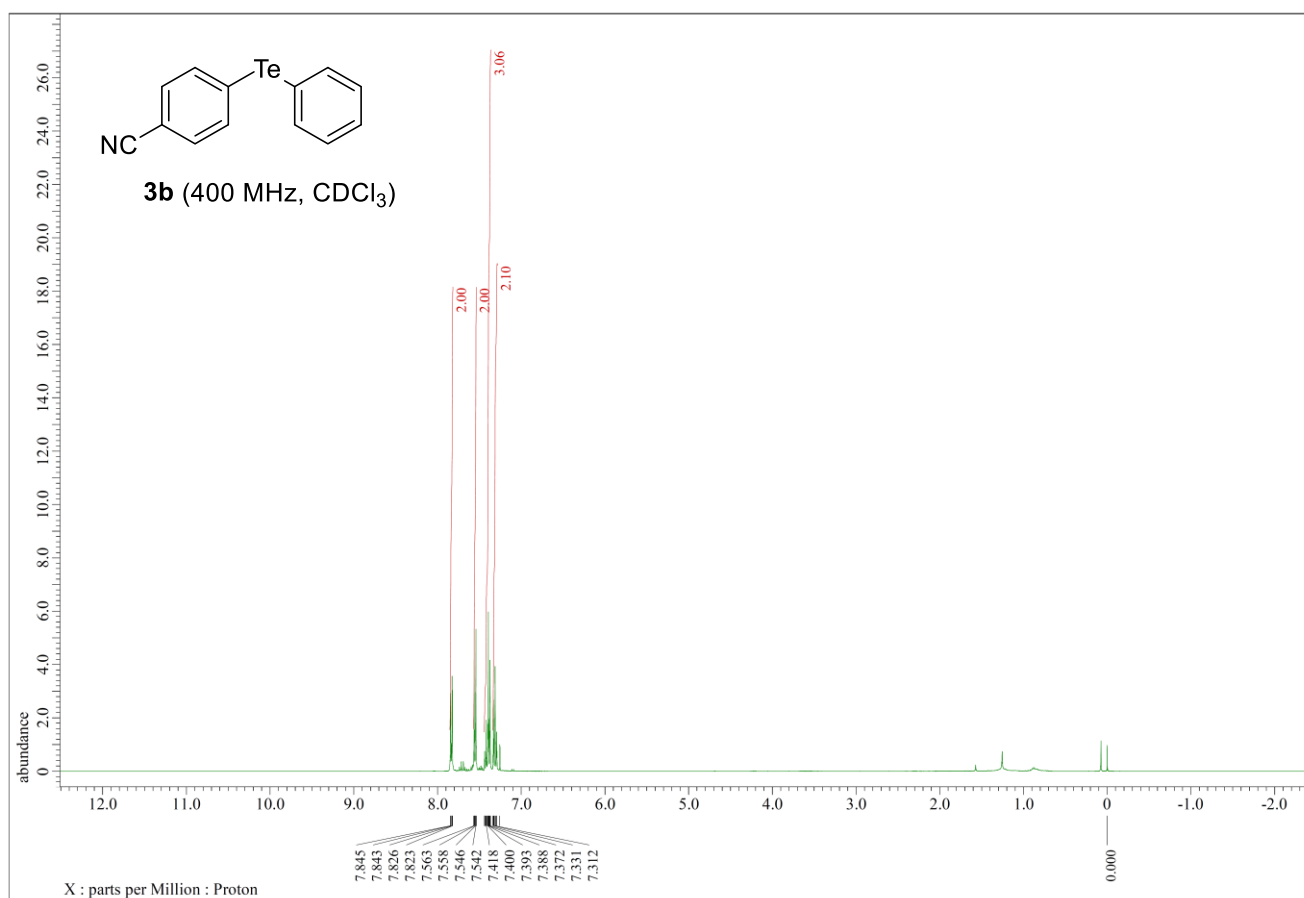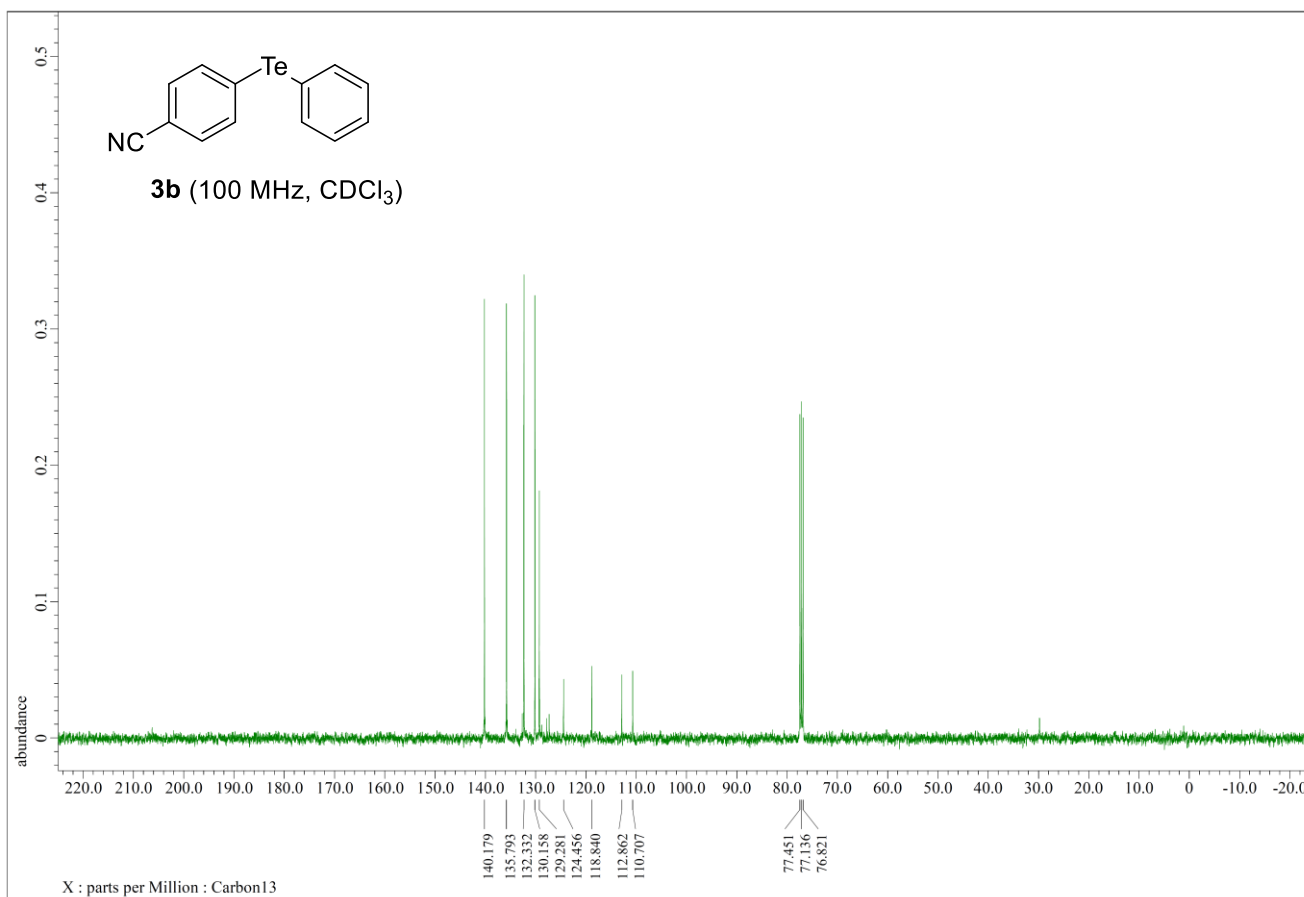

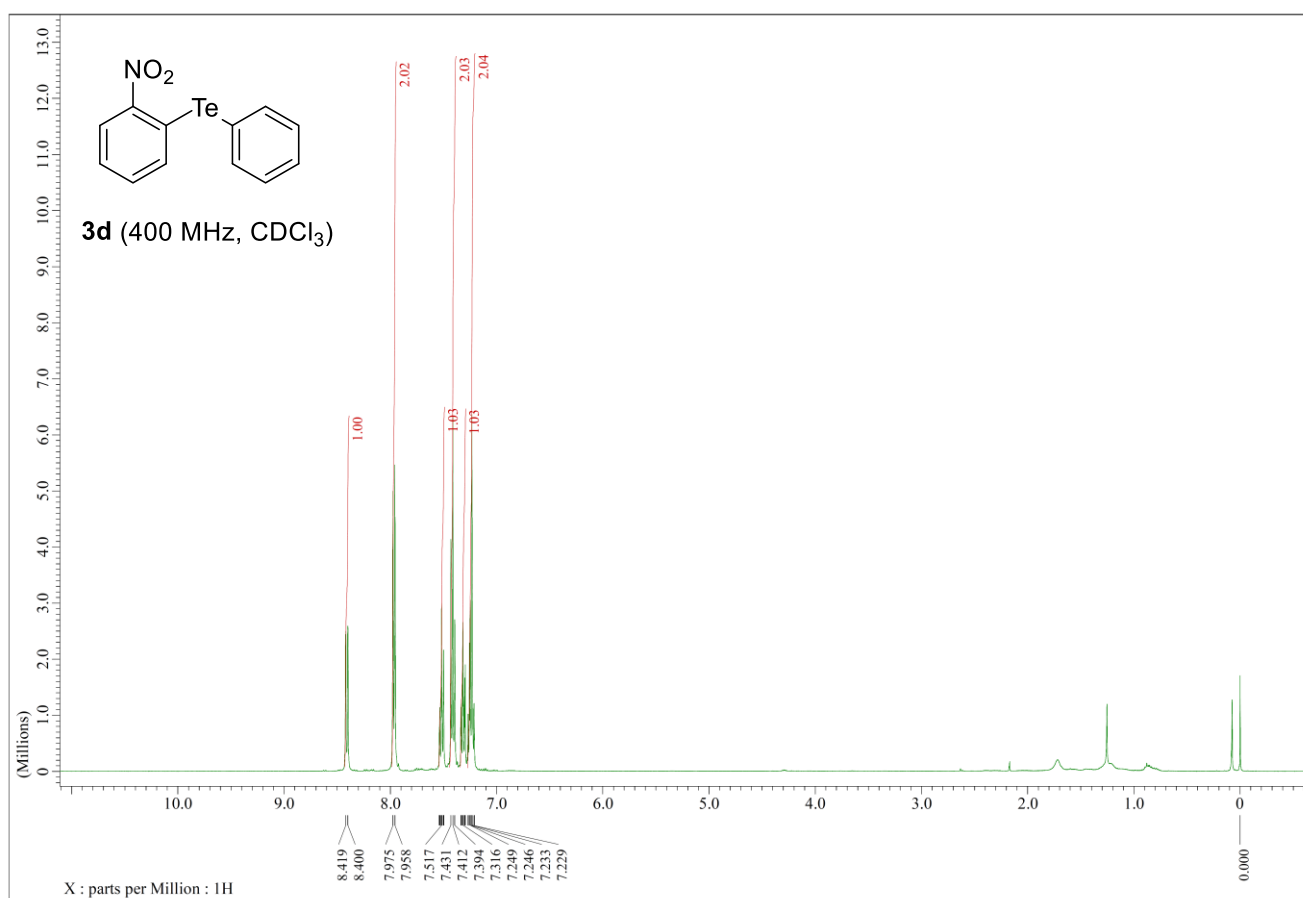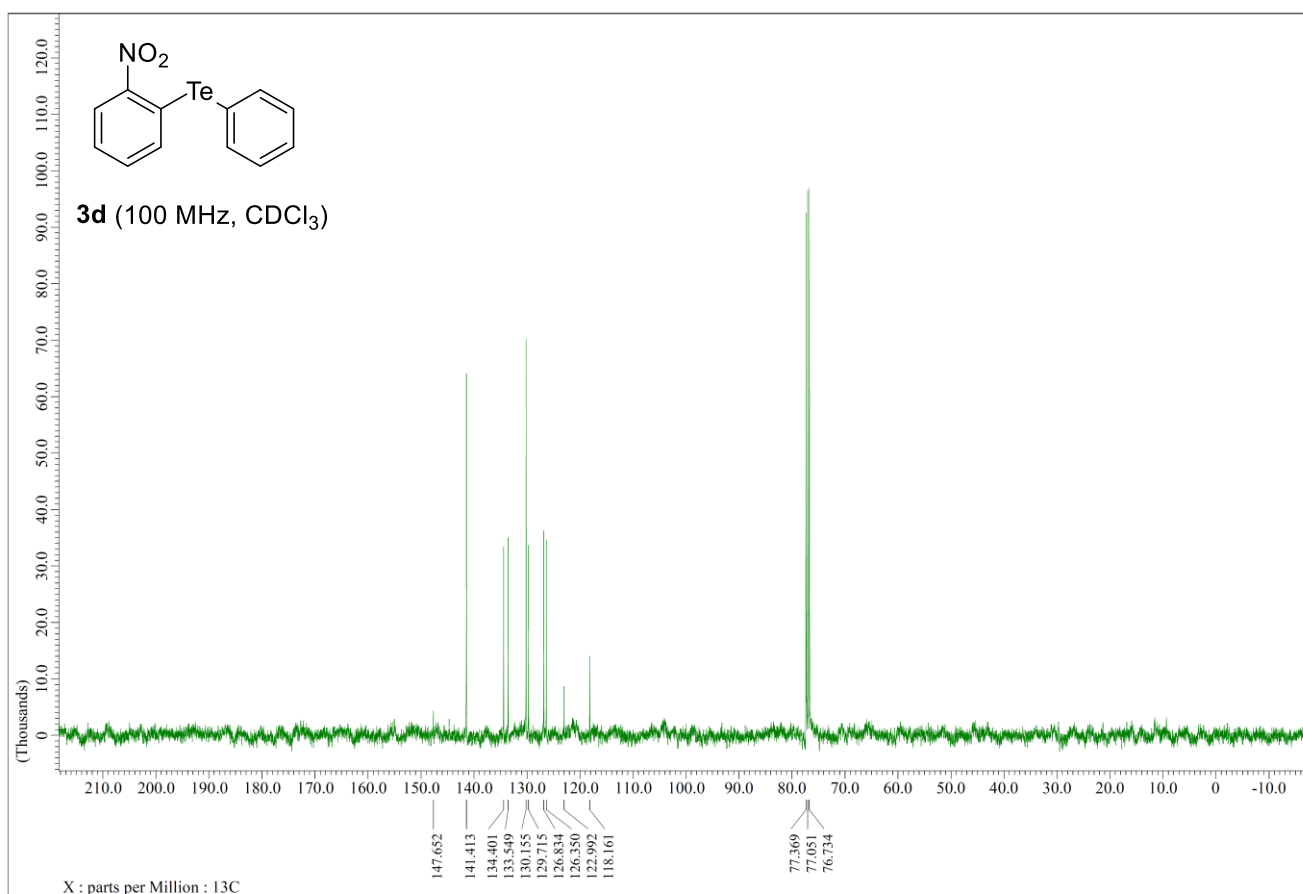

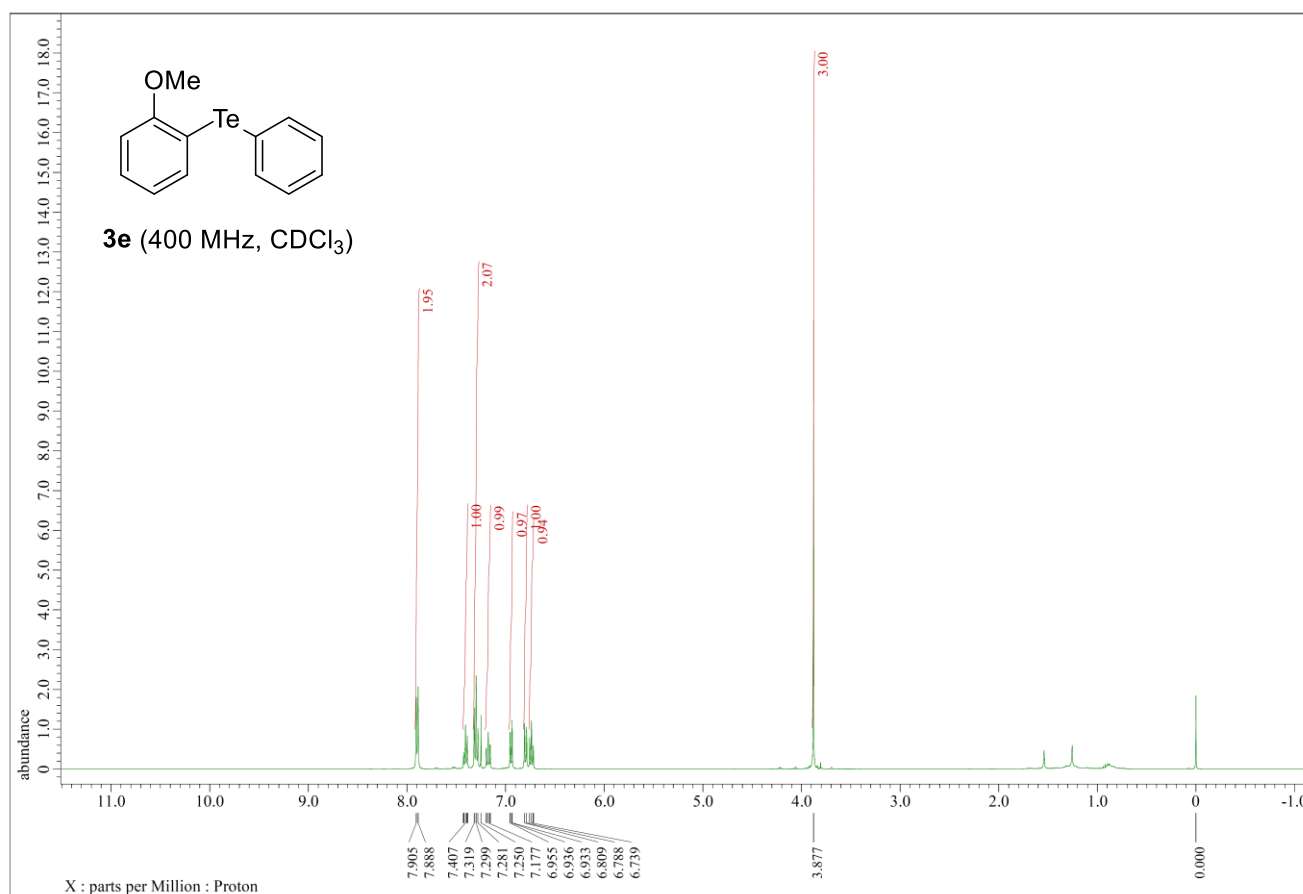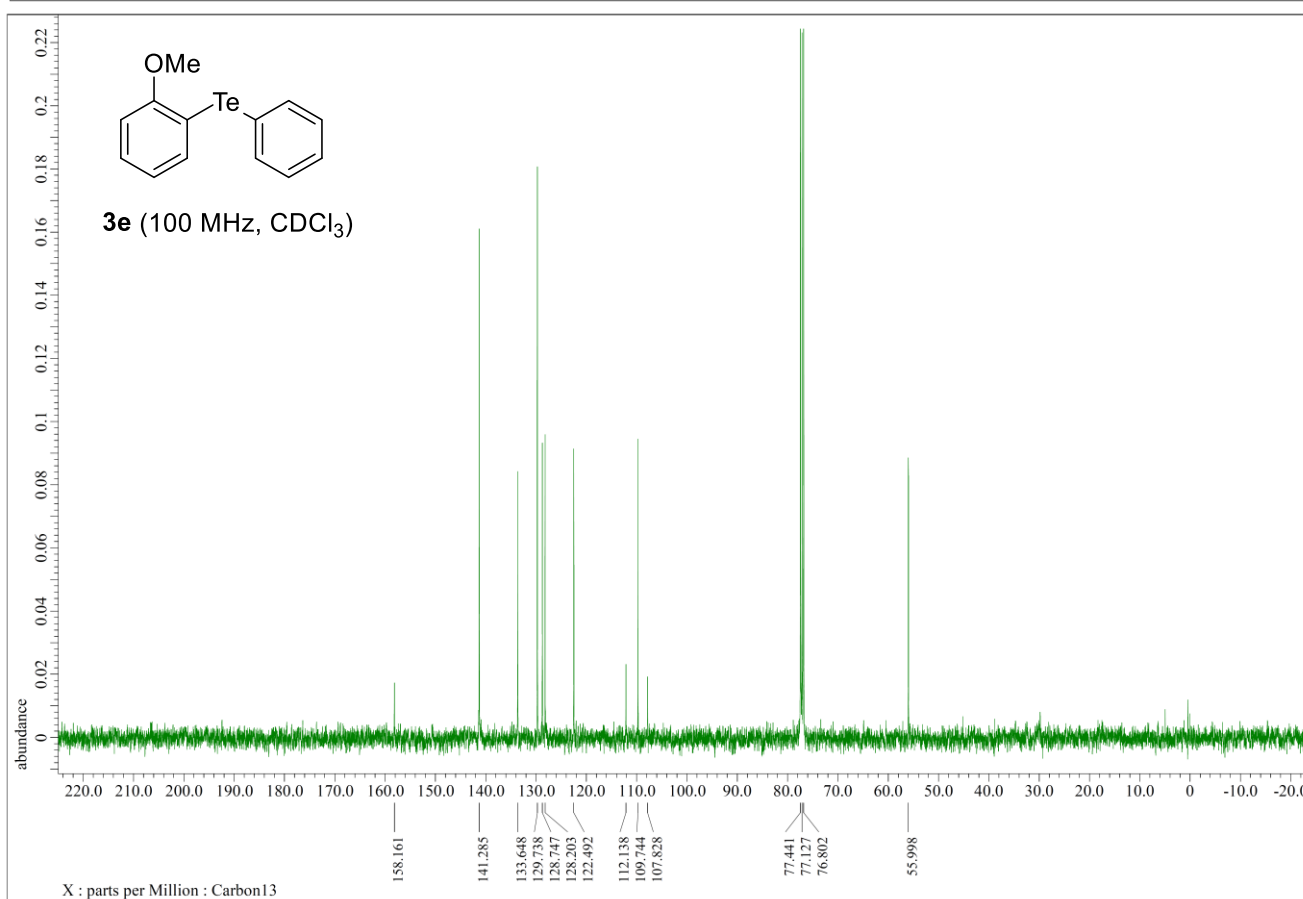

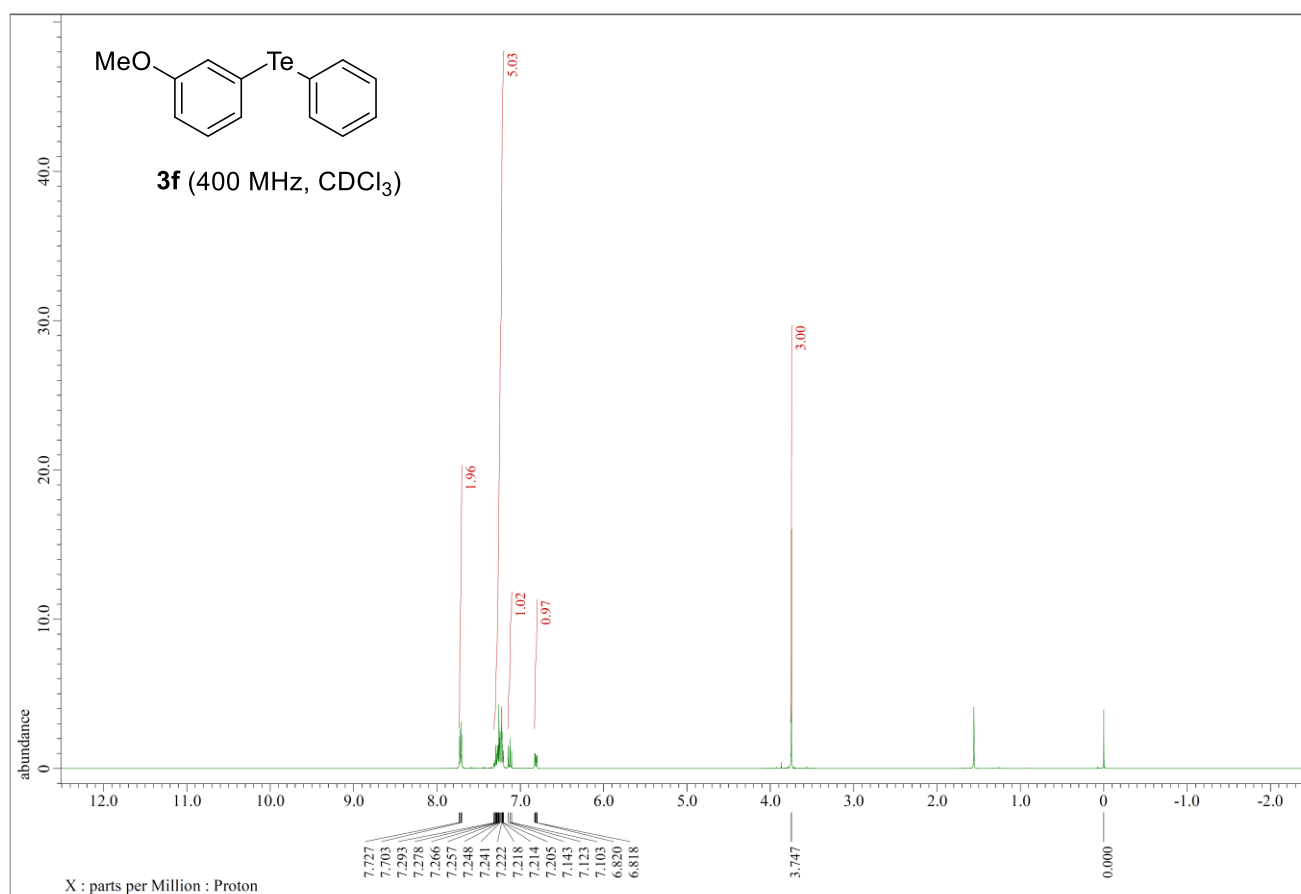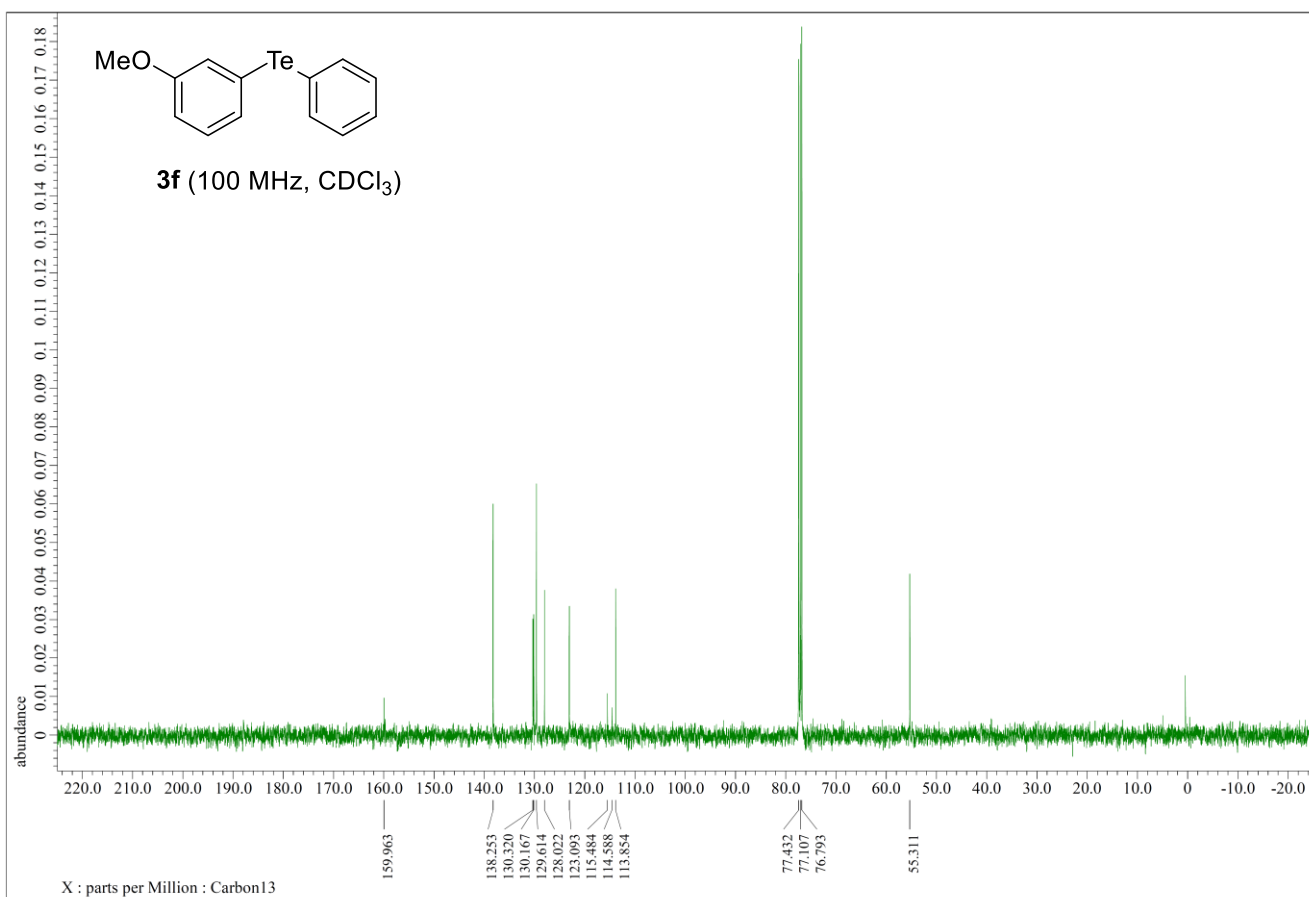

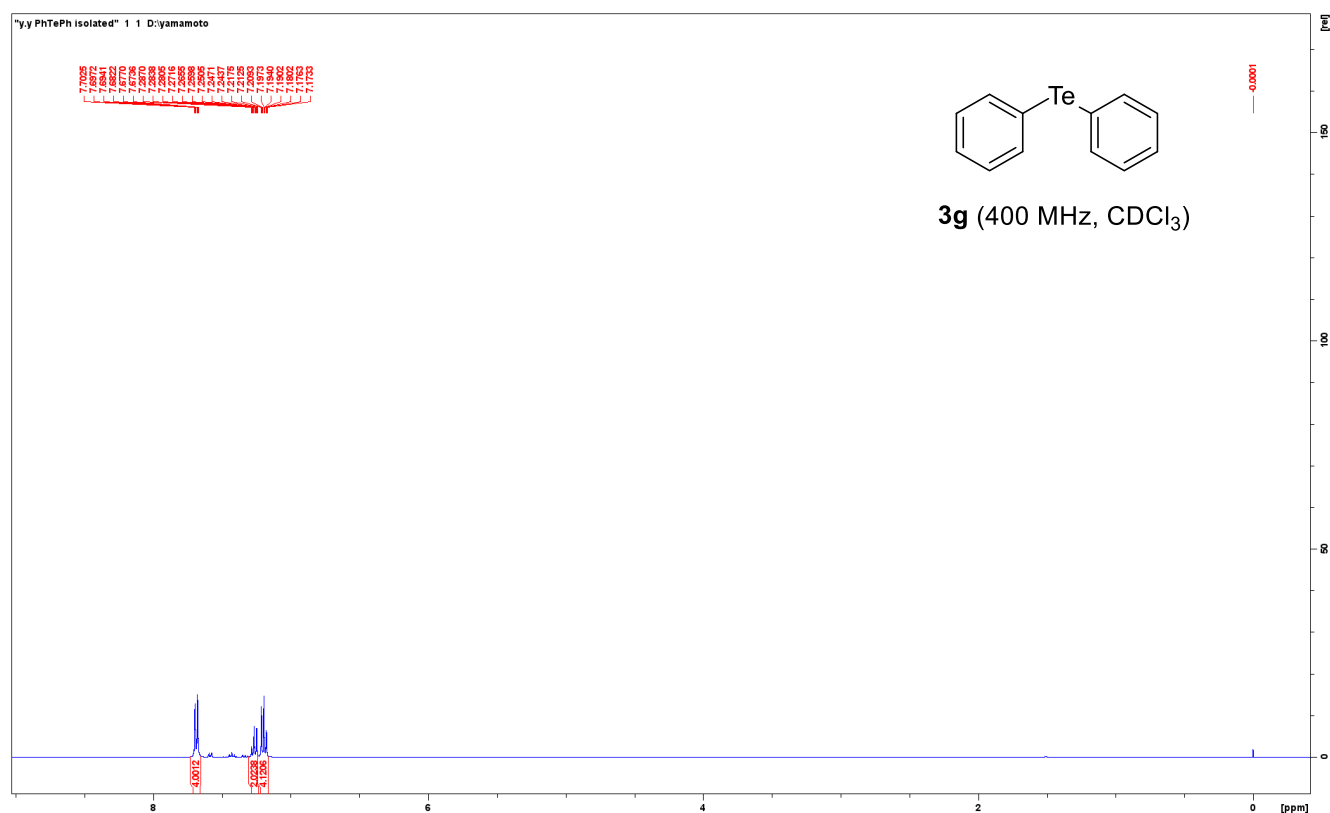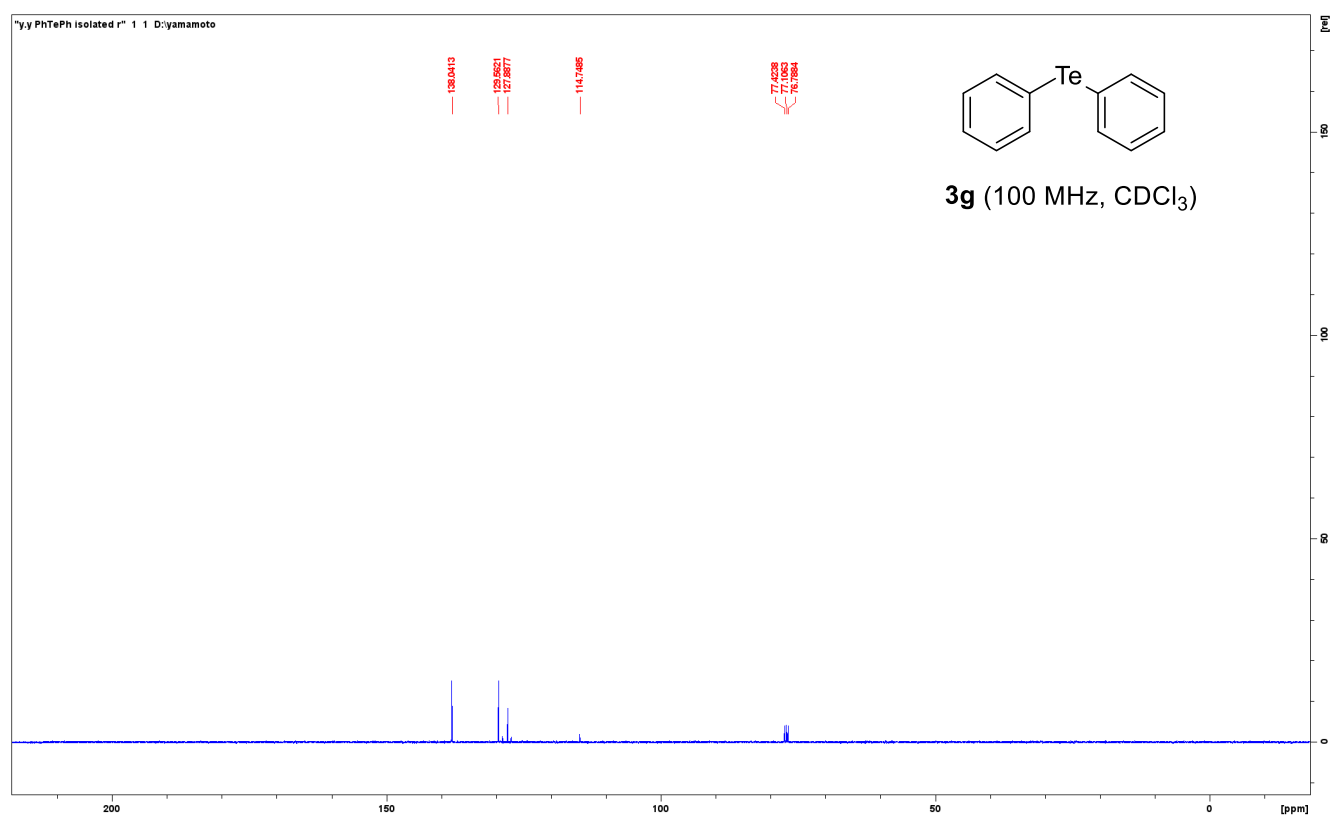

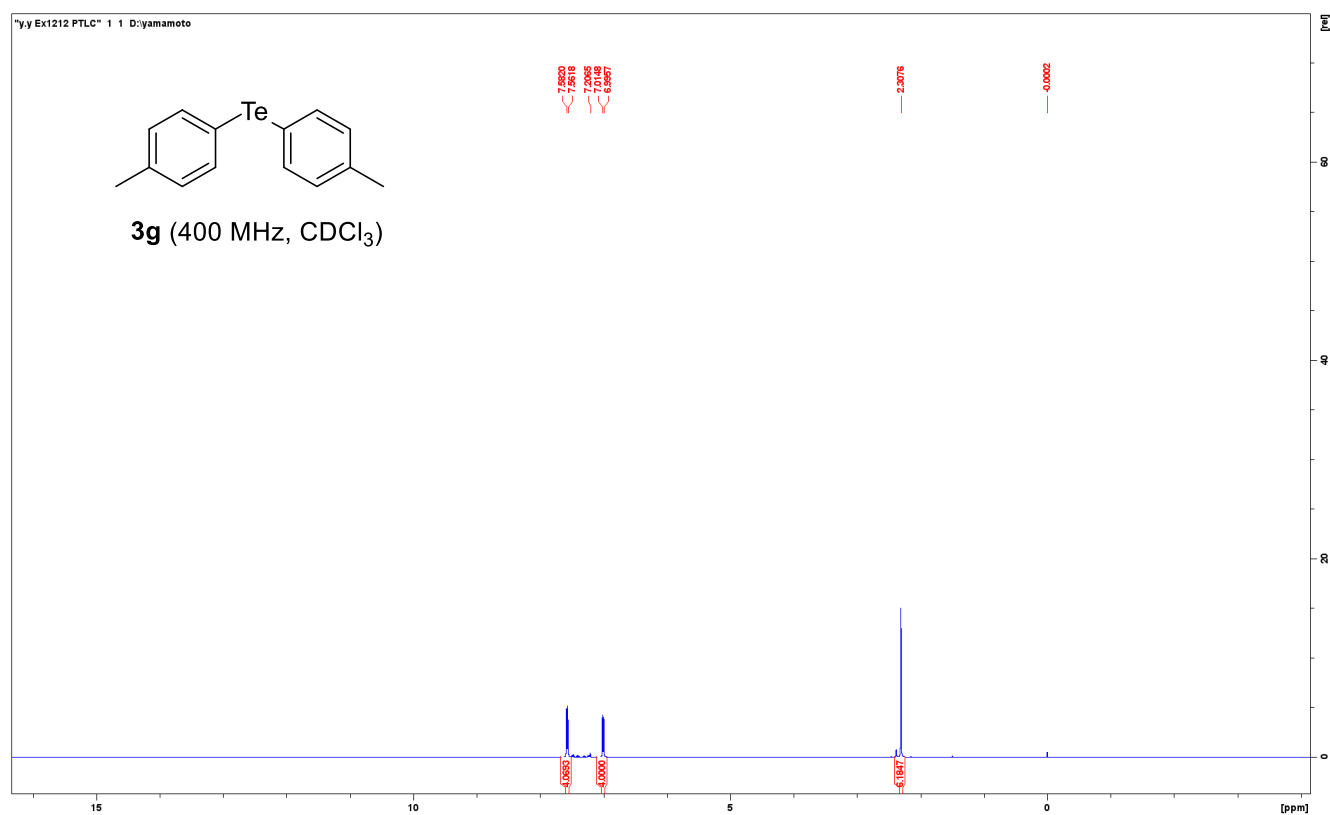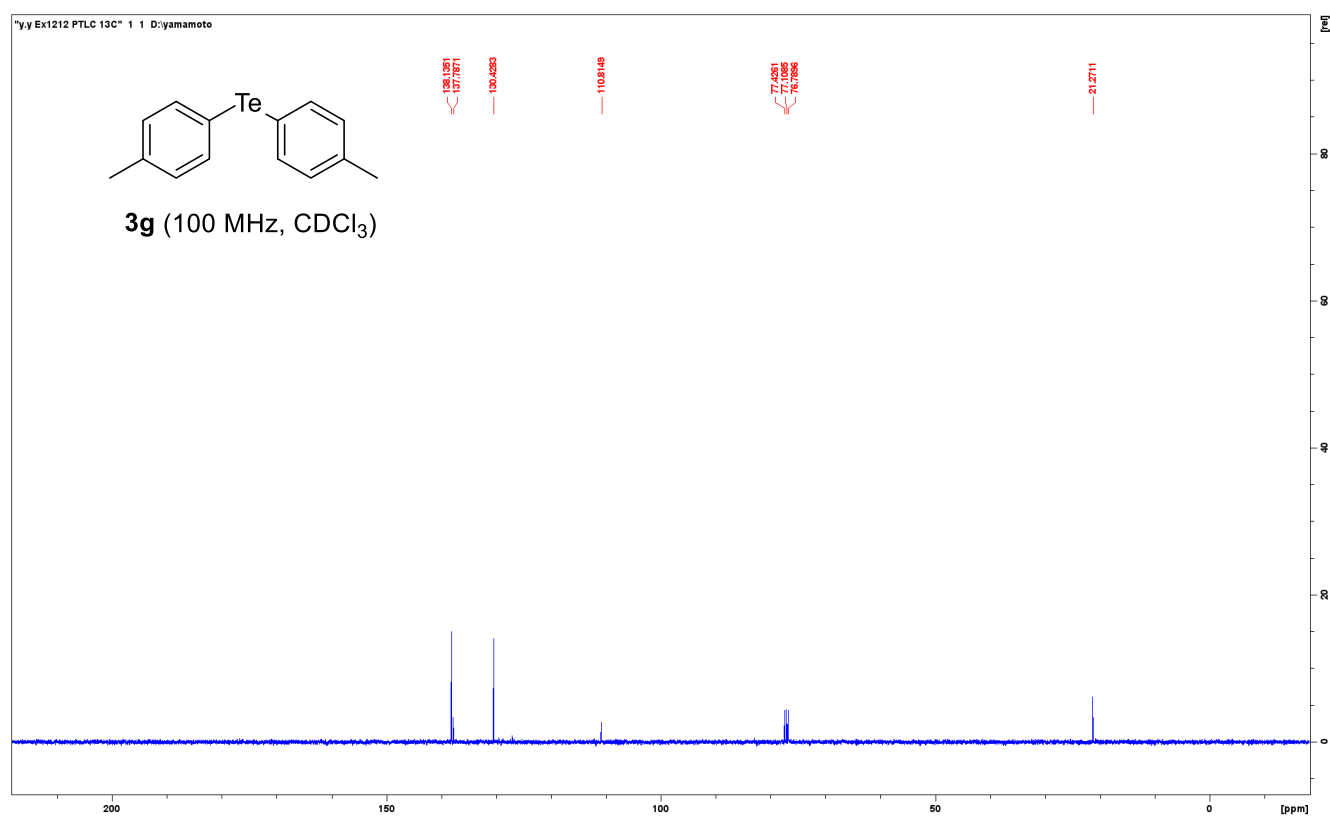



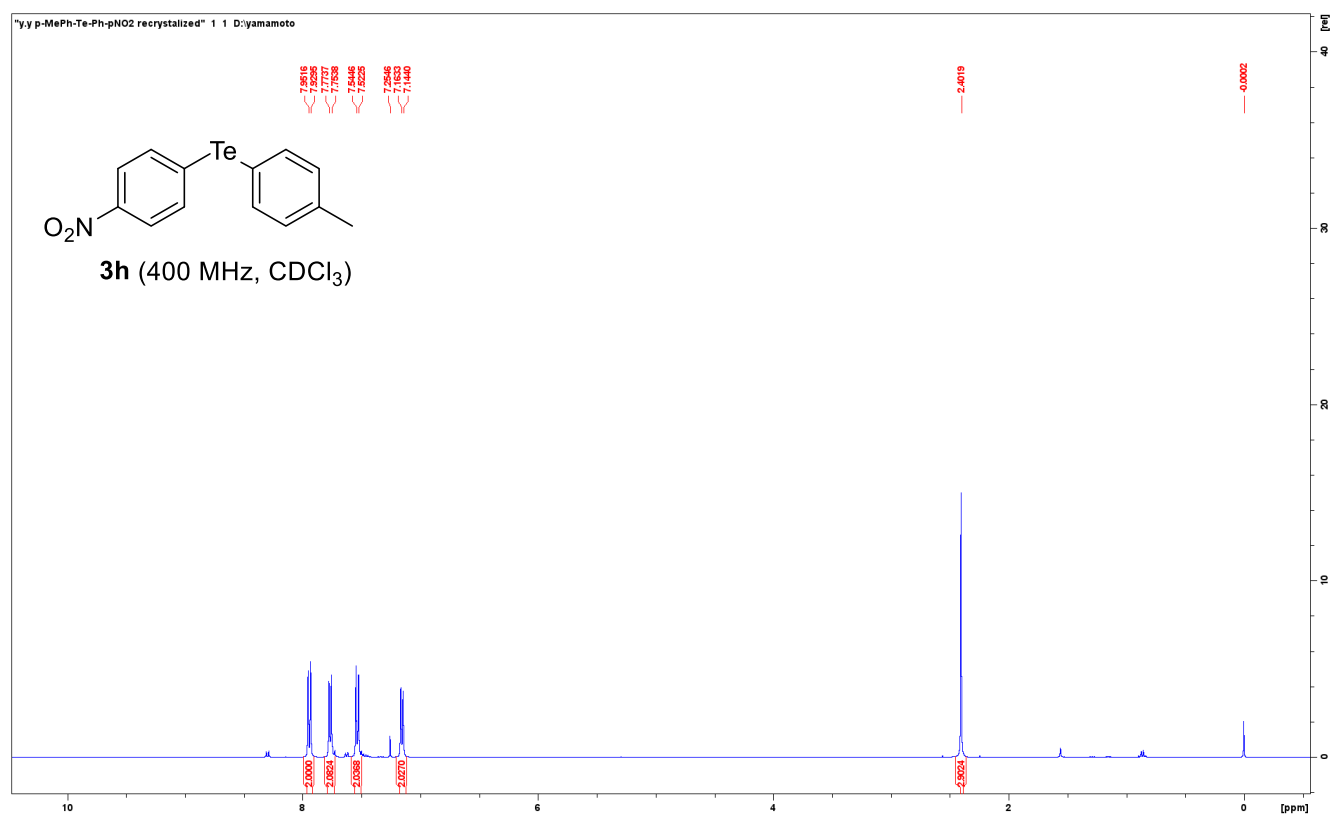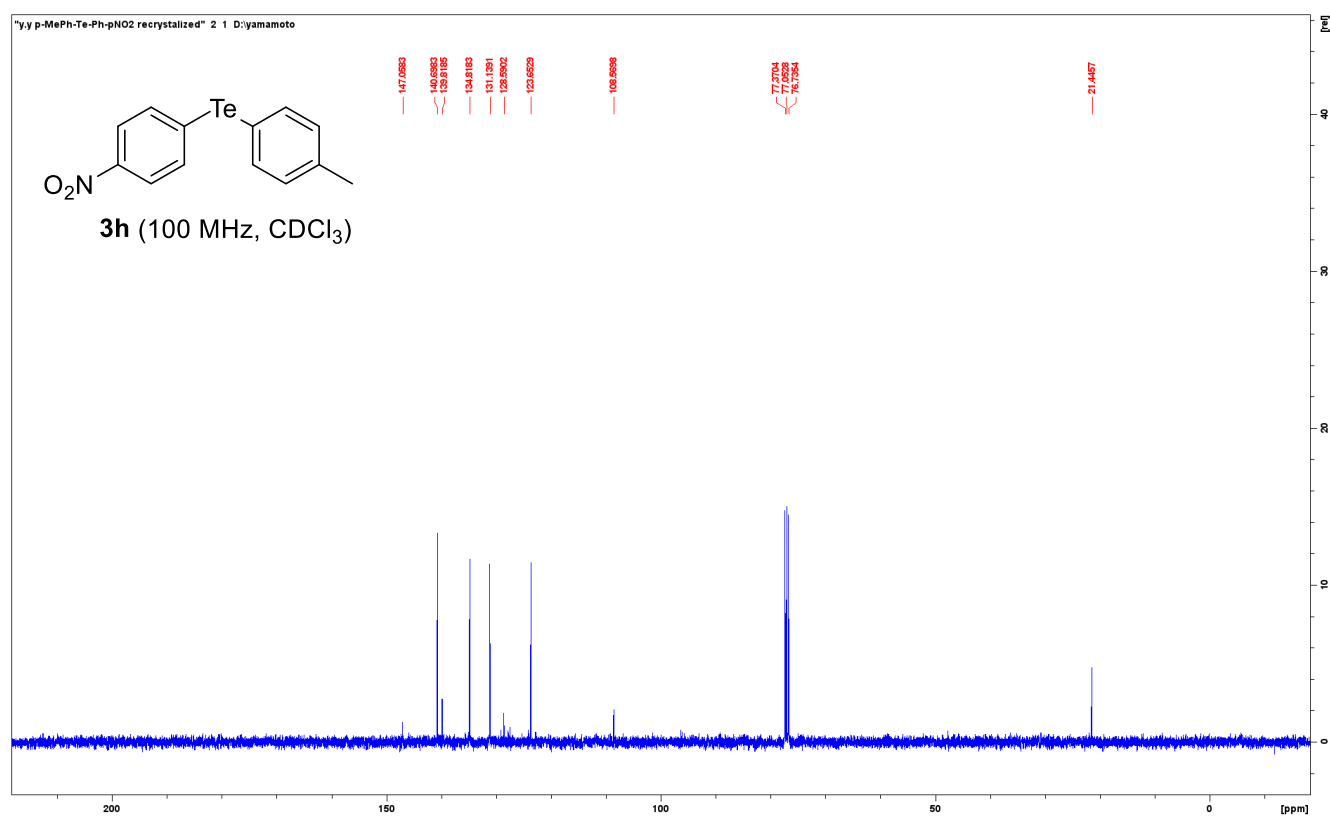

Supplement: s1 [file s1]
